# Supplementary material for: Reversibility of solid state radical reactions in thermally remendable polymers with C–ON bonds
Source: Royal Society of Chemistry journal article supplement (doi:10.1039/c2jm30578j), 2012-01-01
Supplement: c2jm30578j.pdf [file c2jm30578j.pdf]

Supporting Information

**Reversibility of solid state radical reactions in thermally remendable polymers  
with C-ON bonds**

Fei Wang, Min Zhi Rong,\* Ming Qiu Zhang\*

Key Laboratory for Polymeric Composite and Functional Materials of Ministry of  
Education, DSAPM Lab, School of Chemistry and Chemical Engineering,  
Sun Yat-sen University, Guangzhou 510275, China

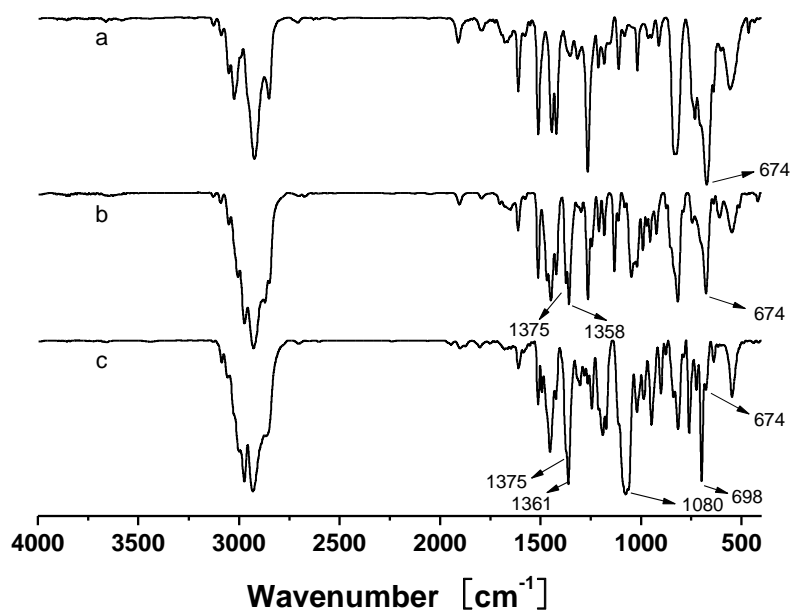

**Figure S1.** FTIR spectra of (a) PCMS, (b) PCMS-TEMPO and (c) PCMS-TEMPO-EOPh.

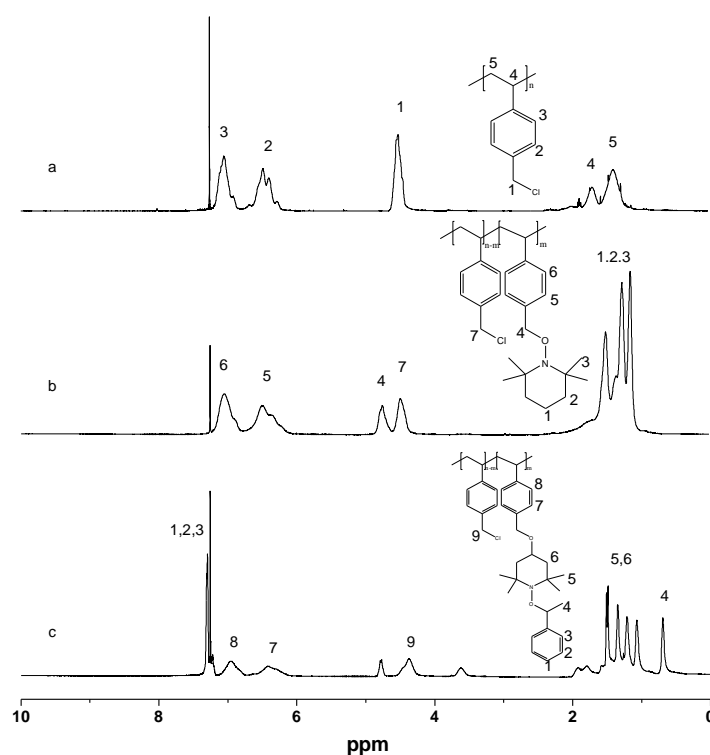

**Figure S2.**  $^1\text{H}$ -NMR spectra of (a) PCMS, (b) PCMS-TEMPO and (c) PCMS-TEMPO-EOPh.

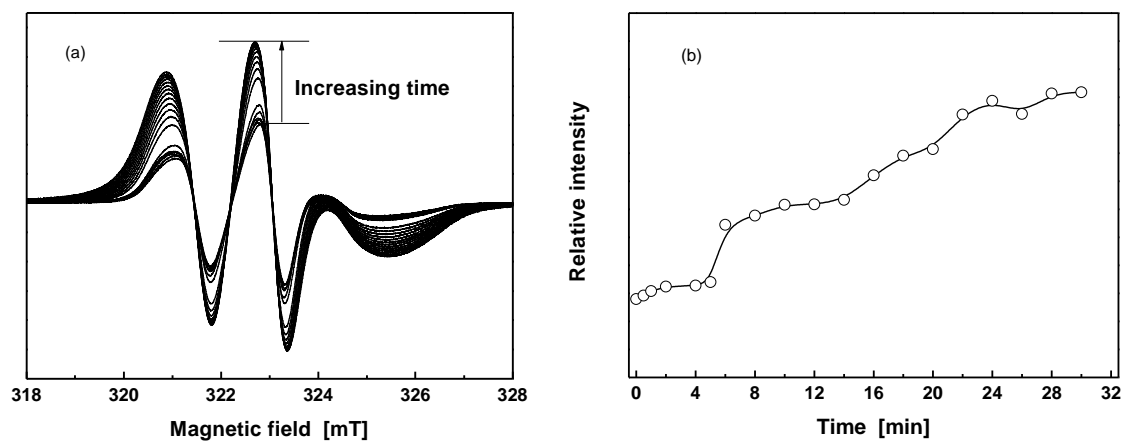

**Figure S3.** (a) ESR spectra of PCMS-TEMPO/PCMS-TEMPO-EOPh blends recorded at 125 °C for different retention times. (b) Time dependence of relative ESR signal intensities calculated from integral area of the spectra.
